# Supplementary material for: GPR120 prevents colorectal adenocarcinoma progression by sustaining the mucosal barrier integrity
Source: PubMed Central journal article supplement (PMC8748819; doi:10.1038/s41598-021-03787-7), 2022-01-10

# Supplementary Figure 1

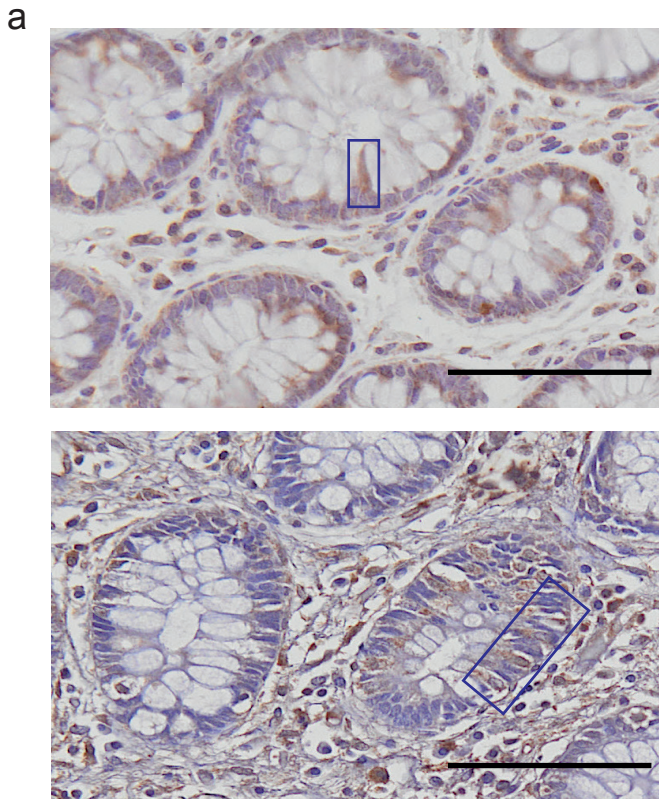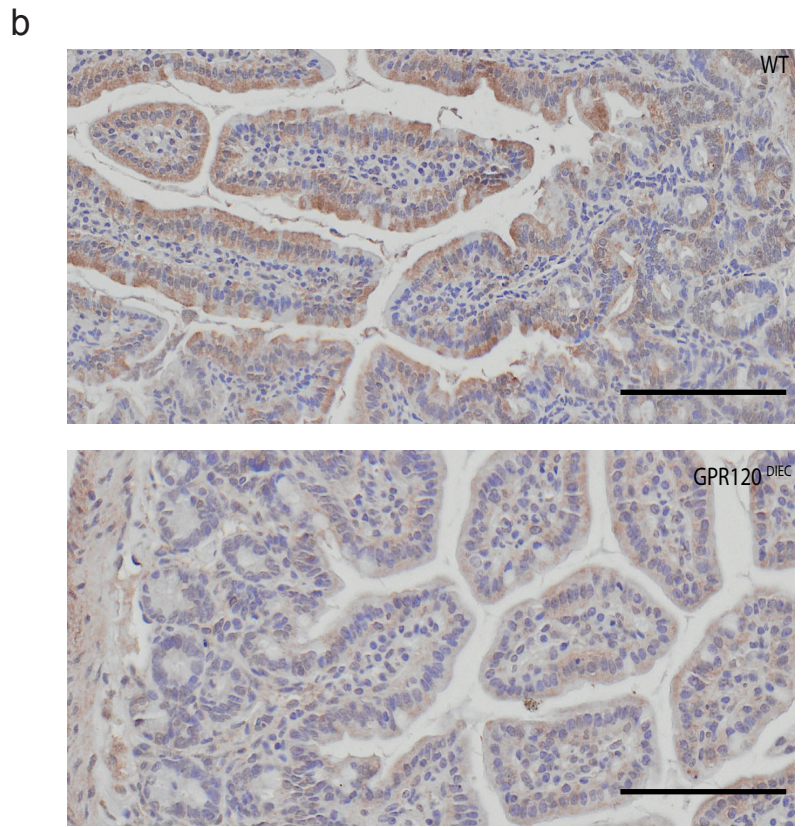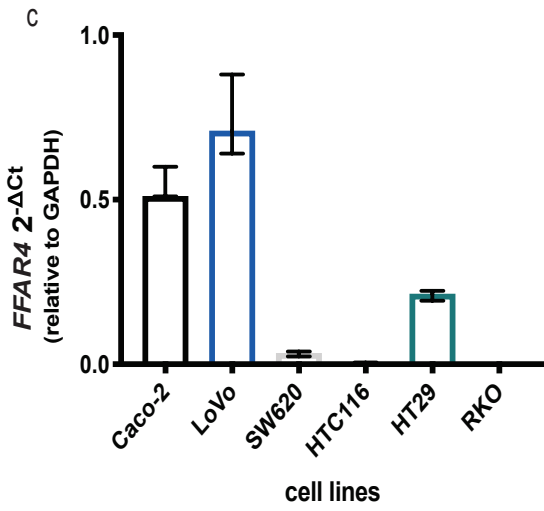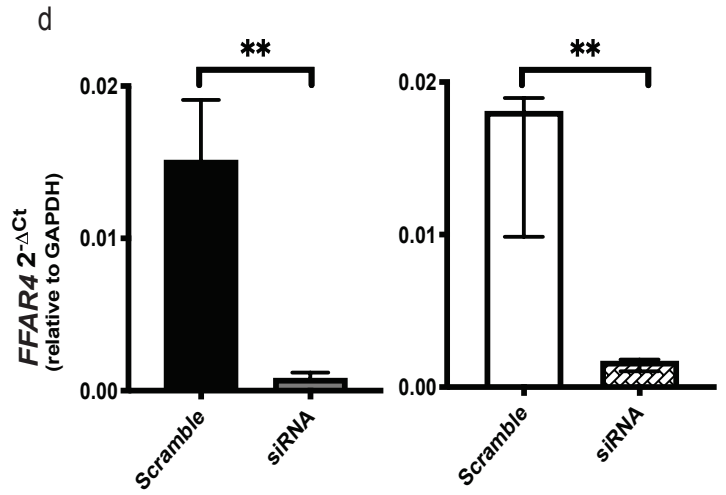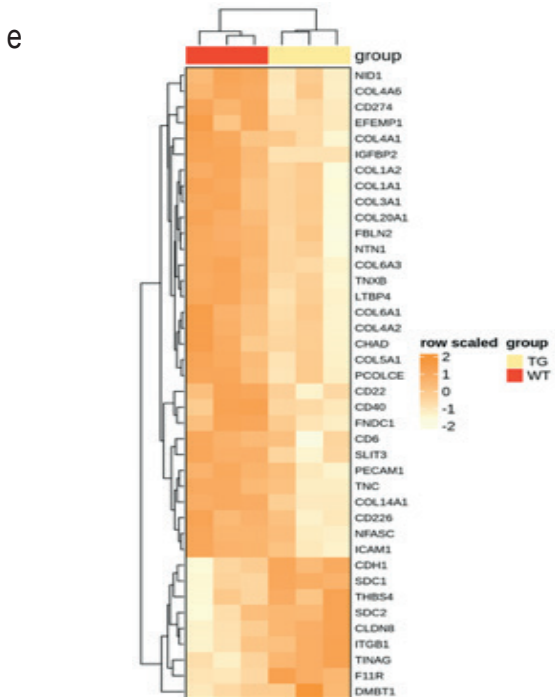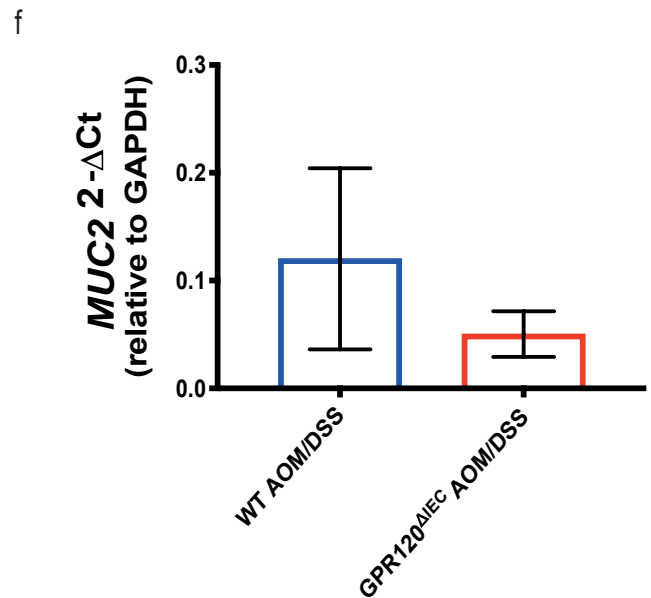

# Supplementary Figure 2

a

| OTU nr. | Taxonomy                                                                                          | T8  |     | log <sub>2</sub> Fold Change | padj    |
|---------|---------------------------------------------------------------------------------------------------|-----|-----|------------------------------|---------|
|         |                                                                                                   | KO  | WT  |                              |         |
| 276629  | <i>p_Bacteroidetes;c_Bacteroidia;o_Bacteroidales;f_S24-7;g_;s_</i>                                | MIN | MAX | -7.31                        | 1.8E-03 |
| 187959  | <i>p_Bacteroidetes;c_Bacteroidia;o_Bacteroidales;f_S24-7;g_;s_</i>                                | MIN | MAX | -6.13                        | 4.6E-02 |
| 348038  | <i>p_Bacteroidetes;c_Bacteroidia;o_Bacteroidales;f_S24-7;g_;s_</i>                                | MIN | MAX | -8.48                        | 2.8E-04 |
| 416078  | <i>p_Bacteroidetes;c_Bacteroidia;o_Bacteroidales;f_S24-7;g_;s_</i>                                | MIN | MAX | -10.69                       | 3.5E-08 |
| 264534  | <i>p_Bacteroidetes;c_Bacteroidia;o_Bacteroidales;f_S24-7;g_;s_</i>                                | MIN | MAX | -6.63                        | 1.4E-02 |
| 273997  | <i>p_Firmicutes;c_Erysipelotrichi;o_Erysipelotrichales;f_Erysipelotrichaceae;g_Allobaculum;s_</i> | MIN | MAX | -5.38                        | 3.0E-02 |
| 268352  | <i>p_Firmicutes;c_Erysipelotrichi;o_Erysipelotrichales;f_Erysipelotrichaceae;g_Allobaculum;s_</i> | MIN | MAX | -5.58                        | 4.6E-02 |
| 272334  | <i>p_Firmicutes;c_Erysipelotrichi;o_Erysipelotrichales;f_Erysipelotrichaceae;g_Allobaculum;s_</i> | MIN | MAX | -4.75                        | 3.0E-02 |
| 581021  | <i>p_Proteobacteria;c_Gammaproteobacteria;o_Enterobacteriales;f_Enterobacteriaceae;g_;s_</i>      | MAX | MIN | 7.80                         | 4.6E-02 |

MIN
  MAX
  -11 to +8

b

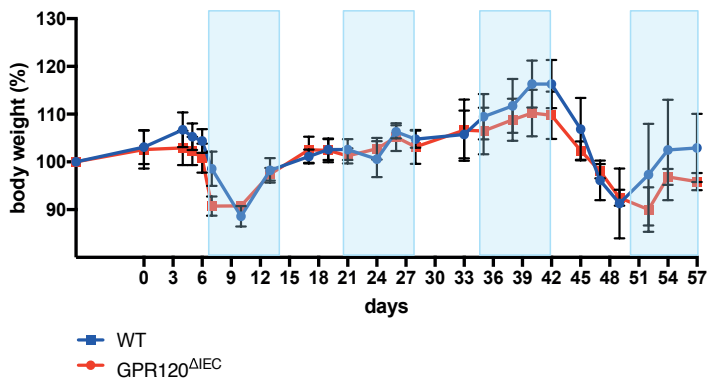

c

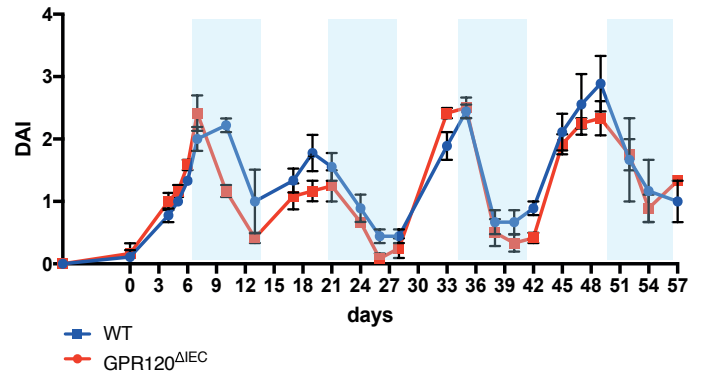

d

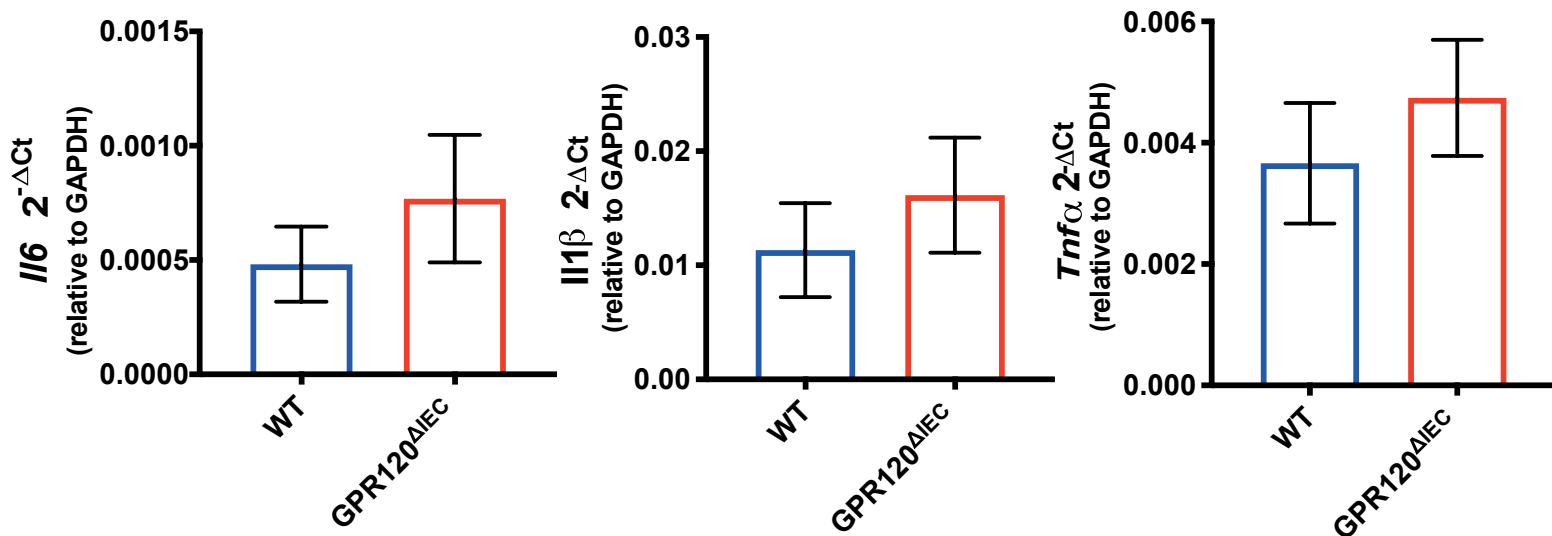

# Supplementary Figure 3

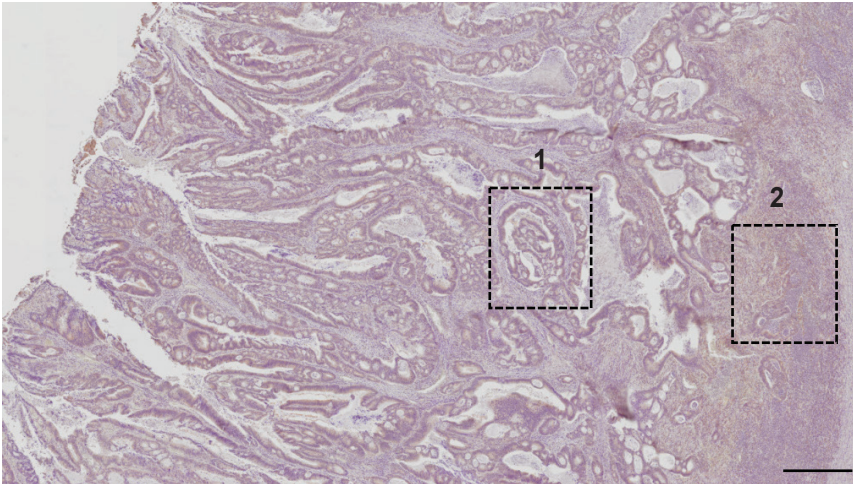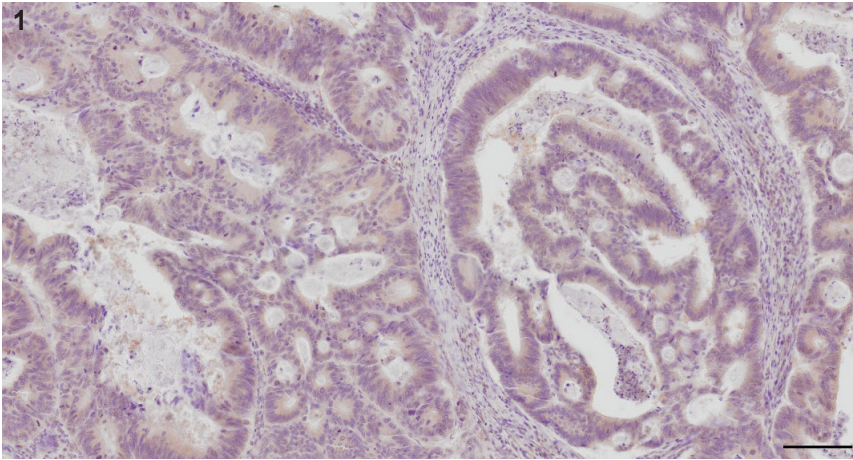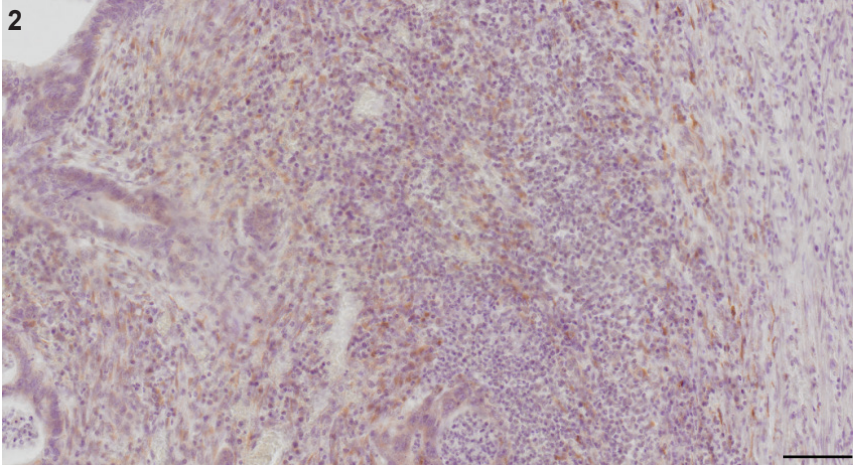

# Supplementary Figure 4

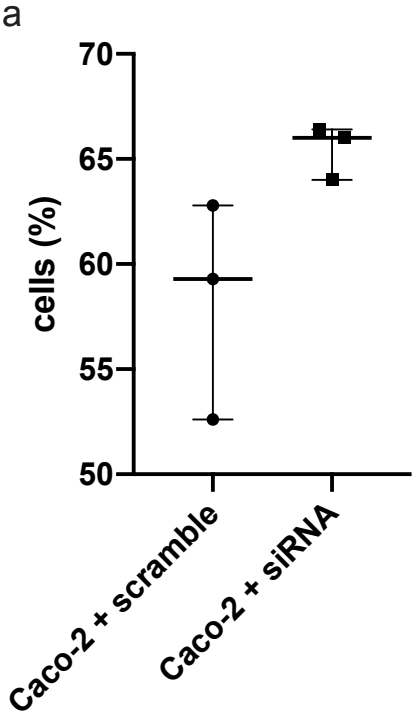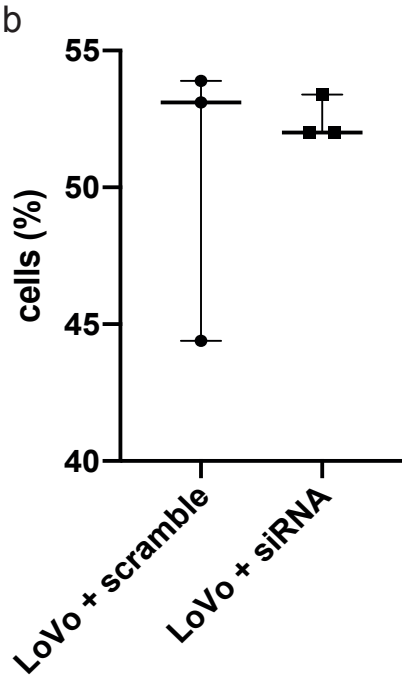

# Supplementary Figure 5

a

## $\omega$ -6 PUFA

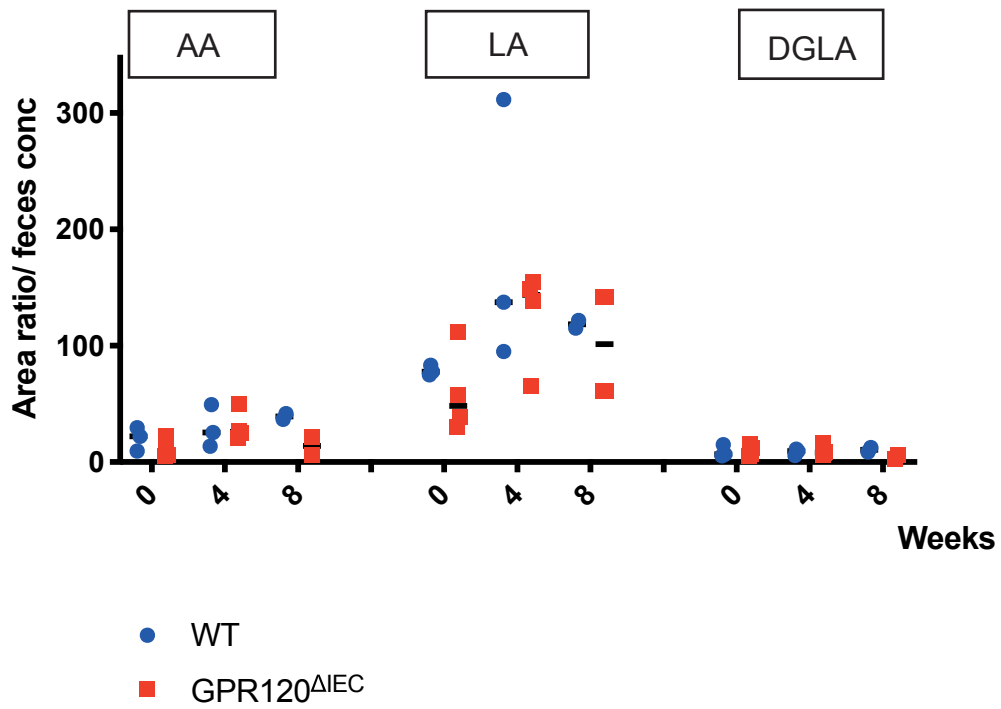

b

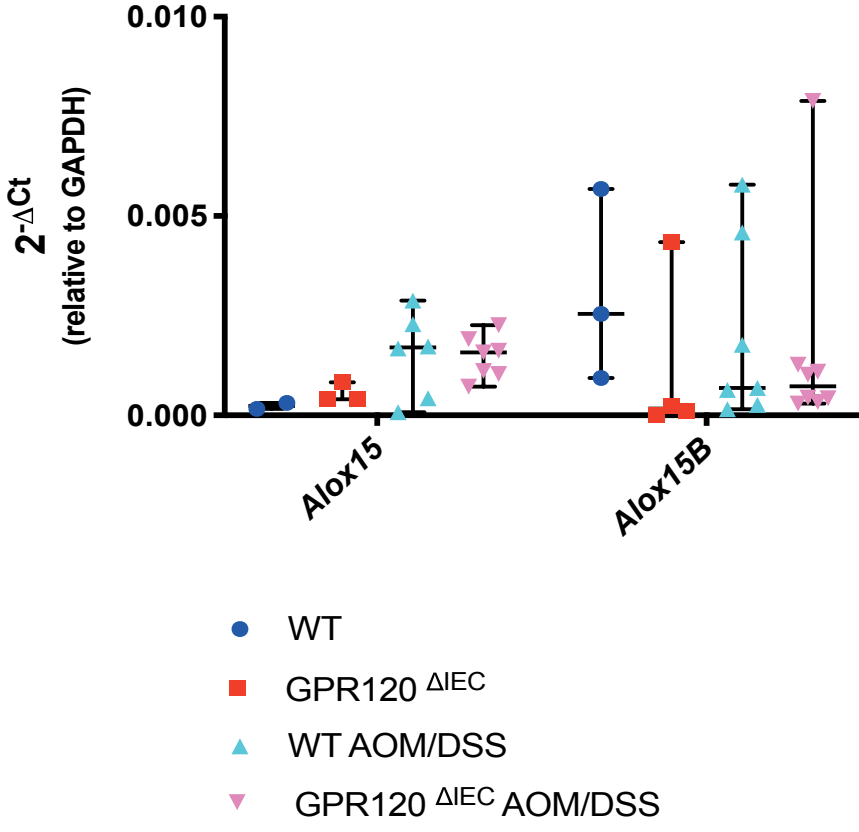

# Supplementary Figure 6

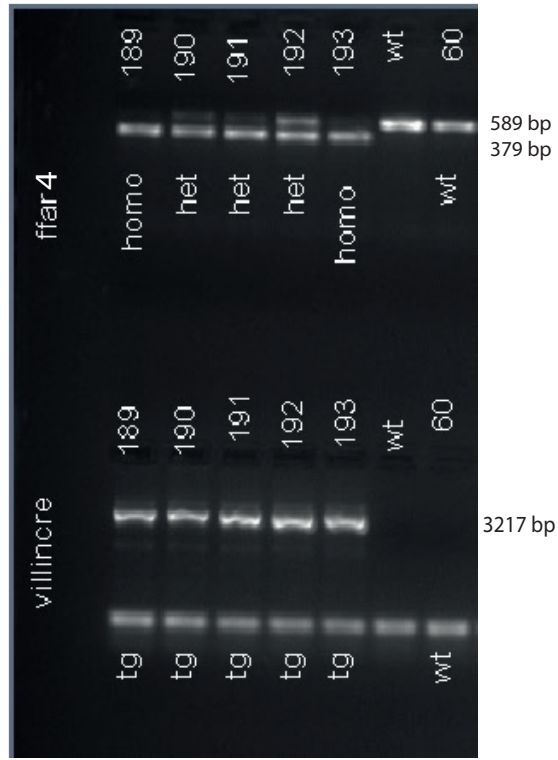

# Supplementary Figure 7

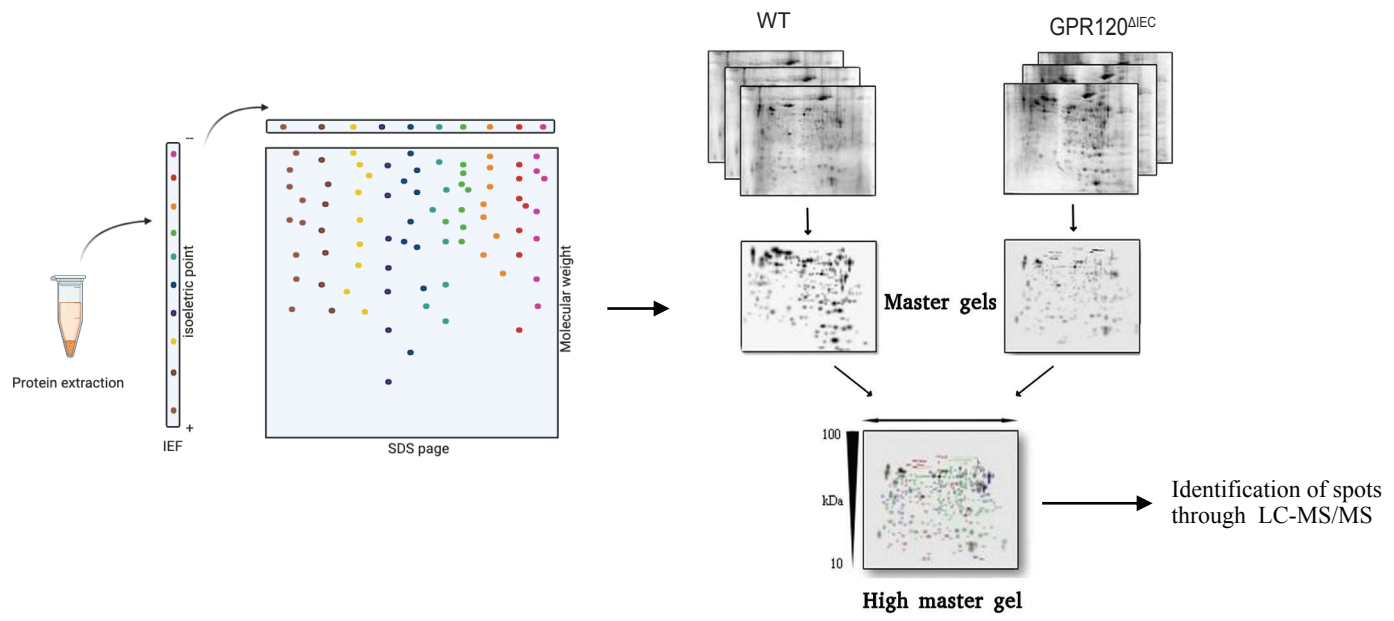

Supplement: 41598_2021_3787_MOESM1_ESM.pdf [file 41598_2021_3787_MOESM1_ESM.pdf]
