# Supplementary material for: GPR120 prevents colorectal adenocarcinoma progression by sustaining the mucosal barrier integrity
Source: PubMed Central journal article supplement (PMC8748819; doi:10.1038/s41598-021-03787-7), 2022-01-10
Supplement: 41598_2021_3787_MOESM2_ESM.pdf [file 41598_2021_3787_MOESM2_ESM.pdf]

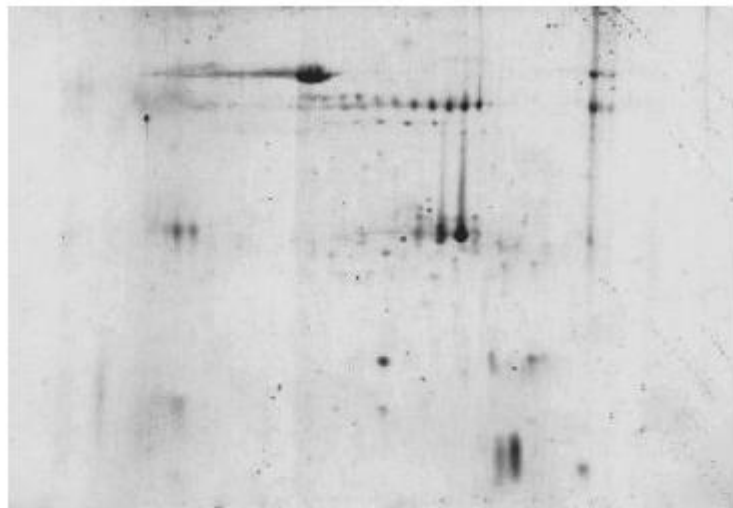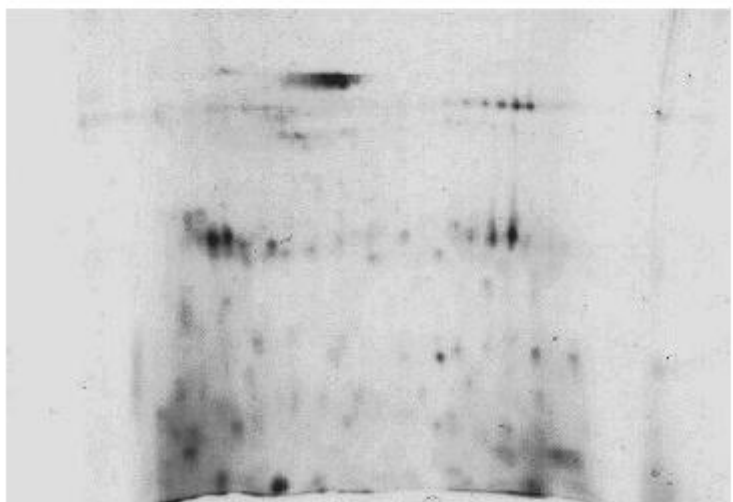

WT

TG

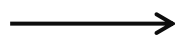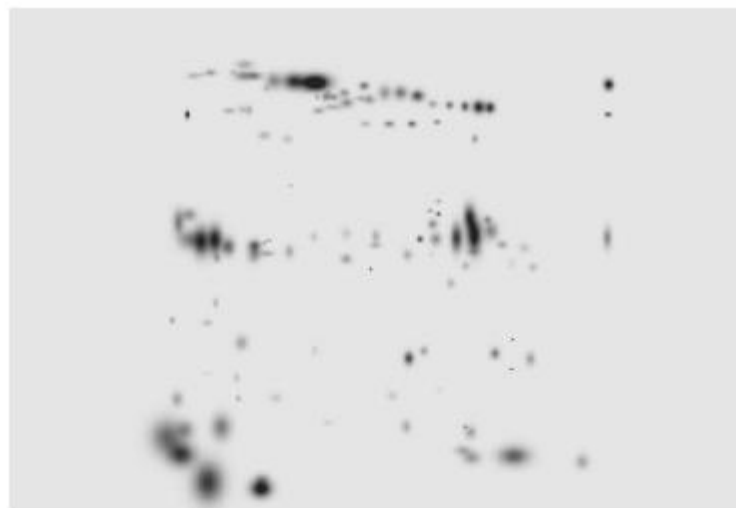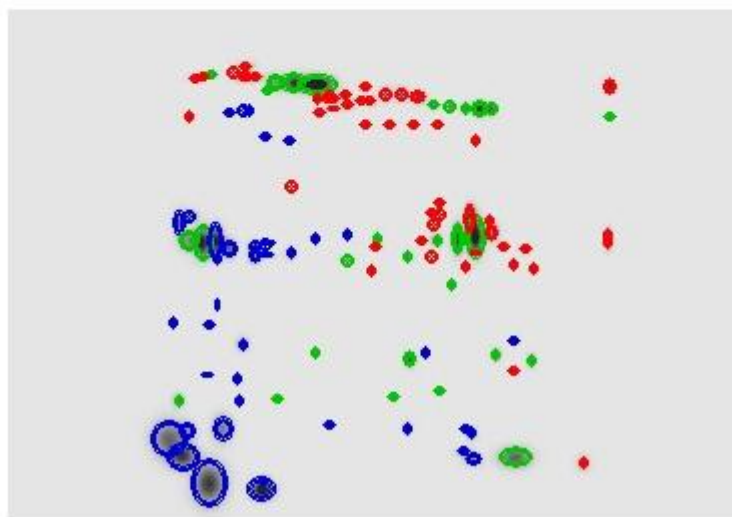

INBOTH

TG

WT
